# Supplementary material
Source: PubMed Central journal article supplement (PMC103296)
Supplement: nar_28_9_1906__1.pdf [file nar_28_9_1906__1.pdf]

## SUPPLEMENTARY MATERIAL

**Table S1.** All atom pairwise root-mean-square derivatives among the nine lowest energy structures

| Pairwise RMSD | 2    | 3    | 4    | 5    | 6    | 7    | 8    | 9    |
|---------------|------|------|------|------|------|------|------|------|
| Structure 1   | 0.28 | 0.28 | 0.32 | 0.39 | 0.39 | 0.24 | 0.36 | 0.36 |
| Structure 2   |      | 0.29 | 0.26 | 0.31 | 0.33 | 0.40 | 0.49 | 0.31 |
| Structure 3   |      |      | 0.15 | 0.41 | 0.41 | 0.40 | 0.37 | 0.35 |
| Structure 4   |      |      |      | 0.39 | 0.38 | 0.42 | 0.39 | 0.32 |
| Structure 5   |      |      |      |      | 0.26 | 0.51 | 0.49 | 0.44 |
| Structure 6   |      |      |      |      |      | 0.39 | 0.39 | 0.29 |
| Structure 7   |      |      |      |      |      |      | 0.33 | 0.31 |
| Structure 8   |      |      |      |      |      |      |      | 0.41 |

**Table S2.** Average values with standard deviation of all the backbone torsion angles and glycosidic dihedral angles for all the nine structures

|            | $\alpha$                                                             | $\beta$               | $\epsilon$           | $\zeta$               | $\chi$                | $\delta$             | $\gamma$                                                             |
|------------|----------------------------------------------------------------------|-----------------------|----------------------|-----------------------|-----------------------|----------------------|----------------------------------------------------------------------|
| <b>A5</b>  | -                                                                    | -                     | -171.5 ( $\pm 1.5$ ) | 97.0 ( $\pm 3.0$ )    | -120.5 ( $\pm 2.5$ )  | 136.5 ( $\pm 4.5$ )  | 58.0 ( $\pm 2.0$ )                                                   |
| <b>G6</b>  | -77.5 ( $\pm 1.5$ )                                                  | -180.0 ( $\pm 1.0$ )  | -178.5 ( $\pm 0.5$ ) | -108.0 ( $\pm 0.0$ )  | -118.0 ( $\pm 0.0$ )  | 132.5 ( $\pm 0.5$ )  | 51.5 ( $\pm 0.5$ )                                                   |
| <b>G7</b>  | -69.0 ( $\pm 1.0$ )                                                  | -177.5 ( $\pm 0.5$ )  | -177.5 ( $\pm 0.5$ ) | -105.0 ( $\pm 1.0$ )  | -123.5 ( $\pm 0.5$ )  | 135.0 ( $\pm 1.0$ )  | 56.0 ( $\pm 0.0$ )                                                   |
| <b>A8</b>  | -71.0 ( $\pm 1.0$ )                                                  | -173.5 ( $\pm 1.5$ )  | -177.5 ( $\pm 0.5$ ) | -104.0 ( $\pm 1.0$ )  | -120.5 ( $\pm 1.5$ )  | 134.0 ( $\pm 1.0$ )  | 54.0 ( $\pm 1.0$ )                                                   |
| <b>T9</b>  | -68.0 ( $\pm 1.0$ )                                                  | -178.0 ( $\pm 1.0$ )  | -174.5 ( $\pm 1.5$ ) | -97.5 ( $\pm 1.5$ )   | -127.0 ( $\pm 2.0$ )  | 129.0 ( $\pm 1.0$ )  | 56.0 ( $\pm 1.0$ )                                                   |
| <b>C10</b> | -70.5 ( $\pm 1.5$ )                                                  | -176.0 ( $\pm 2.0$ )  | -173.0 ( $\pm 1.0$ ) | -104.5 ( $\pm 1.5$ )  | -123.5 ( $\pm 2.5$ )  | 135.0 ( $\pm 1.0$ )  | 51.5 ( $\pm 1.5$ )                                                   |
| <b>C11</b> | -79.0 ( $\pm 3.0$ )                                                  | -173.0 ( $\pm 4.0$ )  | 180.5 ( $\pm 4.5$ )  | 80.5 ( $\pm 4.5$ )    | -100.0 ( $\pm 15.0$ ) | 145.0 ( $\pm 2.0$ )  | 51.5 ( $\pm 2.5$ )                                                   |
| <b>T12</b> | -78.5 ( $\pm 1.5$ )                                                  | -176.0 ( $\pm 2.5$ )  | 175.5 ( $\pm 0.5$ )  | -85.8 ( $\pm 0.5$ )   | -163.0 ( $\pm 1.0$ )  | 124.5 ( $\pm 2.5$ )  | 50.0 ( $\pm 3.0$ )                                                   |
| <b>U13</b> | 175.7 ( $\pm 1.5$ )                                                  | -176.5 ( $\pm 0.5$ )  | -176.0 ( $\pm 1.0$ ) | -170.0 ( $\pm 3.0$ )  | 15.5 ( $\pm 0.5$ )    | 91.0 ( $\pm 0.0$ )   | -163.5 ( $\pm 0.5$ )                                                 |
| <b>T14</b> | 72.0 ( $\pm 0.0$ )                                                   | -73.0 ( $\pm 5.0$ )   | -173.0 ( $\pm 5.0$ ) | -124.0 ( $\pm 14.0$ ) | 24.0 ( $\pm 3.0$ )    | 88.5 ( $\pm 1.5$ )   | -162.5 ( $\pm 2.5$ )                                                 |
| <b>T15</b> | -78.5 ( $\pm 3.5$ )                                                  | -182.0 ( $\pm 5.0$ )  | -178.5 ( $\pm 8.5$ ) | -83.0 ( $\pm 3.0$ )   | -122.0 ( $\pm 5.0$ )  | 132.5 ( $\pm 7.5$ )  | 50.0 ( $\pm 2.0$ )                                                   |
| <b>G16</b> | -64.5 ( $\pm 1.5$ ) <sup>a</sup><br>150.0 ( $\pm 3.0$ ) <sup>b</sup> | -183.0 ( $\pm 13.0$ ) | -177.0 ( $\pm 2.0$ ) | -104.5 ( $\pm 2.5$ )  | -109.0 ( $\pm 16.0$ ) | 134.0 ( $\pm 12.0$ ) | 65.5 ( $\pm 1.5$ ) <sup>a</sup><br>-174.0 ( $\pm 1.0$ ) <sup>b</sup> |
| <b>G17</b> | -68.0 ( $\pm 2.0$ )                                                  | -180.0 ( $\pm 3.5$ )  | -175.5 ( $\pm 1.5$ ) | -108.5 ( $\pm 3.5$ )  | -121.0 ( $\pm 2.0$ )  | 134.5 ( $\pm 1.5$ )  | 54.0 ( $\pm 2.0$ )                                                   |
| <b>A18</b> | -73.5 ( $\pm 1.5$ )                                                  | -173.5 ( $\pm 1.5$ )  | -175.5 ( $\pm 0.5$ ) | -109.05 ( $\pm 1.5$ ) | -120.5 ( $\pm 1.5$ )  | 137.5 ( $\pm 1.5$ )  | 51.5 ( $\pm 0.5$ )                                                   |
| <b>T19</b> | -70.0 ( $\pm 1.0$ )                                                  | -177.5 ( $\pm 1.5$ )  | -174.0 ( $\pm 1.0$ ) | -115.5 ( $\pm 1.5$ )  | -121.0 ( $\pm 1.0$ )  | 135.5 ( $\pm 2.5$ )  | 55.0 ( $\pm 1.0$ )                                                   |
| <b>C20</b> | -69.5 ( $\pm 0.5$ )                                                  | -178.5 ( $\pm 0.5$ )  | -175.5 ( $\pm 0.5$ ) | -115.5 ( $\pm 1.5$ )  | -127.5 ( $\pm 0.5$ )  | 140.5 ( $\pm 0.5$ )  | 57 ( $\pm 1.0$ )                                                     |
| <b>C21</b> | -68.5 ( $\pm 0.5$ )                                                  | -175.5 ( $\pm 0.5$ )  | -178.0 ( $\pm 0.0$ ) | -103.0 ( $\pm 0.0$ )  | -127.0 ( $\pm 0.0$ )  | 139.5 ( $\pm 1.0$ )  | 56.0 ( $\pm 0.0$ )                                                   |
| <b>T22</b> | -67.0 ( $\pm 0.0$ )                                                  | -175.0 ( $\pm 0.0$ )  |                      |                       | -122.5 ( $\pm 0.5$ )  | 138.0 ( $\pm 0.0$ )  | 54.0 ( $\pm 0.0$ )                                                   |

The value in parenthesis is the deviation from average.

<sup>a</sup>Average of five structures.

<sup>b</sup>Average of four structures.
